# Supplementary material for: Ionization dynamics of aminopyridine dimer: a direct ab initio molecular dynamics (MD) study
Source: Royal Society of Chemistry journal article supplement (doi:10.1039/c0cp01542c), 2011-01-01
Supplement: c0cp01542c.pdf [file c0cp01542c.pdf]

## SUPPORTING INFORMATION

### *Ionization Dynamics of Aminopyridine Dimer: A Direct Ab-initio Molecular*

#### *Dynamics (MD) Study*

Hiroto TACHIKAWA and Takahiro FUKUZUMI

*Division of Materials Chemistry, Graduate School of Engineering,*

*Hokkaido University, Sapporo 060-8628, JAPAN*

---

#### 1. Direct ab-initio MD calculation of (AP)<sub>2</sub> at 10 K.

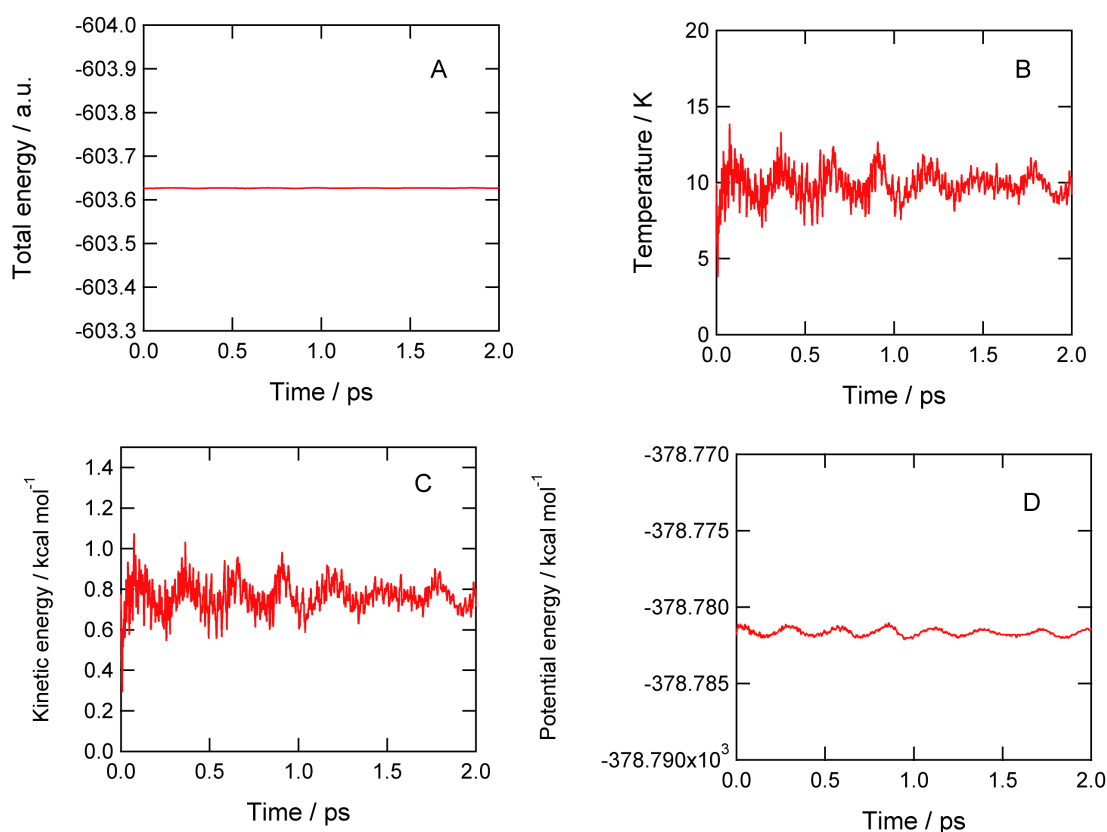

**Figure S1.** Result of direct ab-initio MD calculation of 2-aminopyridine dimer (AP)<sub>2</sub> at 10 K. Time profiles of (A) total energy, (B) temperature, (C) kinetic energy, and (D) potential energy.

## 2. Ionization dynamics of (AP)<sub>2</sub>.

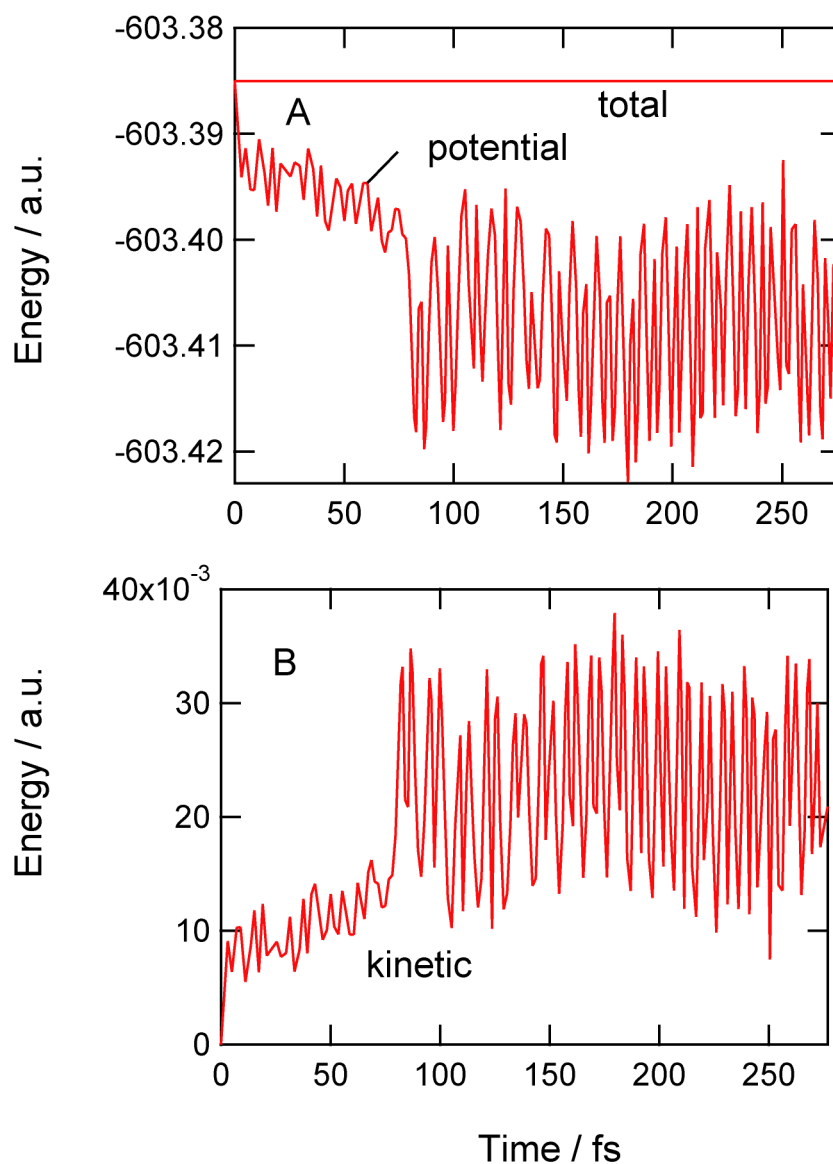

*Figure S2.* Time propagation of potential, kinetic and total energies of the ionization reaction of 2-aminopyridine dimer (AP)<sub>2</sub> obtained by direct ab-initio MD calculation.

### 3. Comparison of potential energies calculated by HF and MP2 methods.

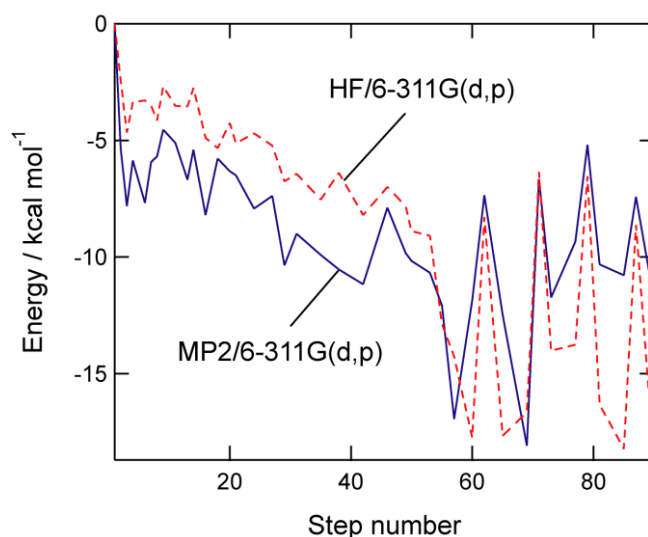

**Figure S3.** Time propagation of potential energy of the ionization reaction of 2-aminopyridine dimer. Direct ab-initio MD calculation was carried out at the HF/6-311G(d,p) level.

### 4. Harmonic vibrational frequencies

**Table S1.** Harmonic vibrational frequencies of  $(AP)_2^+$  (Cs).

| frequency / $\text{cm}^{-1}$ |          |          |          |          |           |           |
|------------------------------|----------|----------|----------|----------|-----------|-----------|
| $(AP)_2^+$ (Cs)              |          |          |          |          |           |           |
| HF                           | 3906(a') | 3716(a') | 3645(a') | 3513(a') | 3400(a')  | 3383(a')  |
| /6-311G(d,p)                 | 3374(a') | 3371(a') | 3358(a') | 3355(a') | 3343(a')  | 3333(a')  |
|                              | 1861(a') | 1846(a') | 1829(a') | 1726(a') | 1641(a')  | 1630(a')  |
|                              | 1626(a') | 1584(a') | 1561(a') | 1522(a') | 1510(a')  | 1466(a')  |
|                              | 1429(a') | 1402(a') | 1350(a') | 1331(a') | 1273(a')  | 1264(a')  |
|                              | 1231(a') | 1227(a') | 1160(a') | 1154(a') | 1137(a'') | 1105(a'') |
|                              | 1105(a') | 1086(a') | 1070(a') | 1041(a') | 1029(a'') | 1015(a'') |

|           |          |          |          |          |          |
|-----------|----------|----------|----------|----------|----------|
| 1014(a'') | 946(a'') | 913(a')  | 898(a'') | 881(a')  | 860(a'') |
| 814(a'')  | 808(a'') | 793(a'') | 738(a'') | 706(a'') | 680(a')  |
| 661(a')   | 604(a')  | 594(a')  | 565(a'') | 509(a')  | 504(a'') |
| 454(a')   | 445(a'') | 424(a'') | 405(a'') | 225(a'') | 210(a'') |
| 142(a')   | 104(a'') | 80(a')   | 70(a')   | 44(a'')  | 22(a'')  |

|                |          |           |           |          |           |          |
|----------------|----------|-----------|-----------|----------|-----------|----------|
| B3LYP          | 3673(a') | 3484(a')  | 3239(a')  | 3232(a') | 3217(a')  | 3212(a') |
| /6-311++G(d,p) | 3207(a') | 3199(a')  | 3193(a')  | 3185(a') | 3159(a')  | 2950(a') |
|                | 1729(a') | 1713(a')  | 1677(a')  | 1588(a') | 1582(a')  | 1555(a') |
|                | 1520(a') | 1486(a')  | 1467(a')  | 1431(a') | 1409(a')  | 1385(a') |
|                | 1368(a') | 1359(a')  | 1300(a')  | 1284(a') | 1196(a')  | 1186(a') |
|                | 1176(a') | 1157(a')  | 1110(a')  | 1086(a') | 1055(a'') | 1051(a') |
|                | 1046(a') | 1021(a'') | 1013(a'') | 1008(a') | 991(?a)   | 990(?a)  |
|                | 965(a'') | 885(a'')  | 868(a'')  | 862(a')  | 853(a')   | 802(a'') |
|                | 790(a'') | 761(a'')  | 736(a'')  | 724(a'') | 696(a'')  | 641(a')  |
|                | 632(a')  | 578(a')   | 561(a')   | 526(a'') | 491(a')   | 485(a'') |
|                | 431(a')  | 404(a'')  | 396(a'')  | 381(a'') | 209(a'')  | 187(a'') |
|                | 164(a')  | 101(a'')  | 90(a')    | 87(a')   | 44(a'')   | 22(a'')  |

## 5. Optimized Structure of (AP)<sub>2</sub>

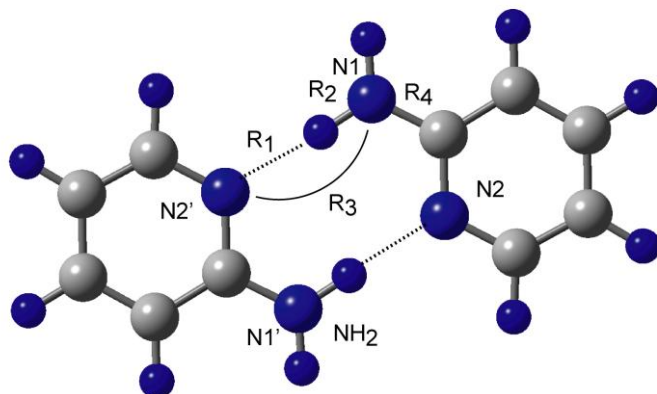

*Table S2.* Optimized geometries of  $(AP)_2$  and  $(AP)_2^+$  calculated at the HF/6-311G(d,p), MP2/6-311G(d,p) and B3PW91/6-311G(d,p) level. The bond distances are in Å.

| $(AP)_2$   | parameter | HF    | MP2   | B3PW91 |
|------------|-----------|-------|-------|--------|
|            | $R_1$     | 2.204 | 1.997 | 1.965  |
|            | $R_2$     | 0.999 | 1.021 | 1.026  |
|            | $R_3$     | 2.204 | 1.997 | 1.965  |
|            | $R_2'$    | 0.989 | 1.004 | 1.003  |
|            |           |       |       |        |
| $(AP)_2^+$ | parameter | HF    | MP2   | B3PW91 |
|            | $R_1$     | 1.013 | 1.054 | 1.051  |
|            | $R_2$     | 1.982 | 1.749 | 1.783  |
|            | $R_3$     | 2.092 | 1.937 | 1.921  |
|            | $R_2'$    | 1.006 | 1.020 | 1.020  |
|            |           |       |       |        |

## 6. Ionization dynamics of AP-(H<sub>2</sub>O)<sub>2</sub> complex

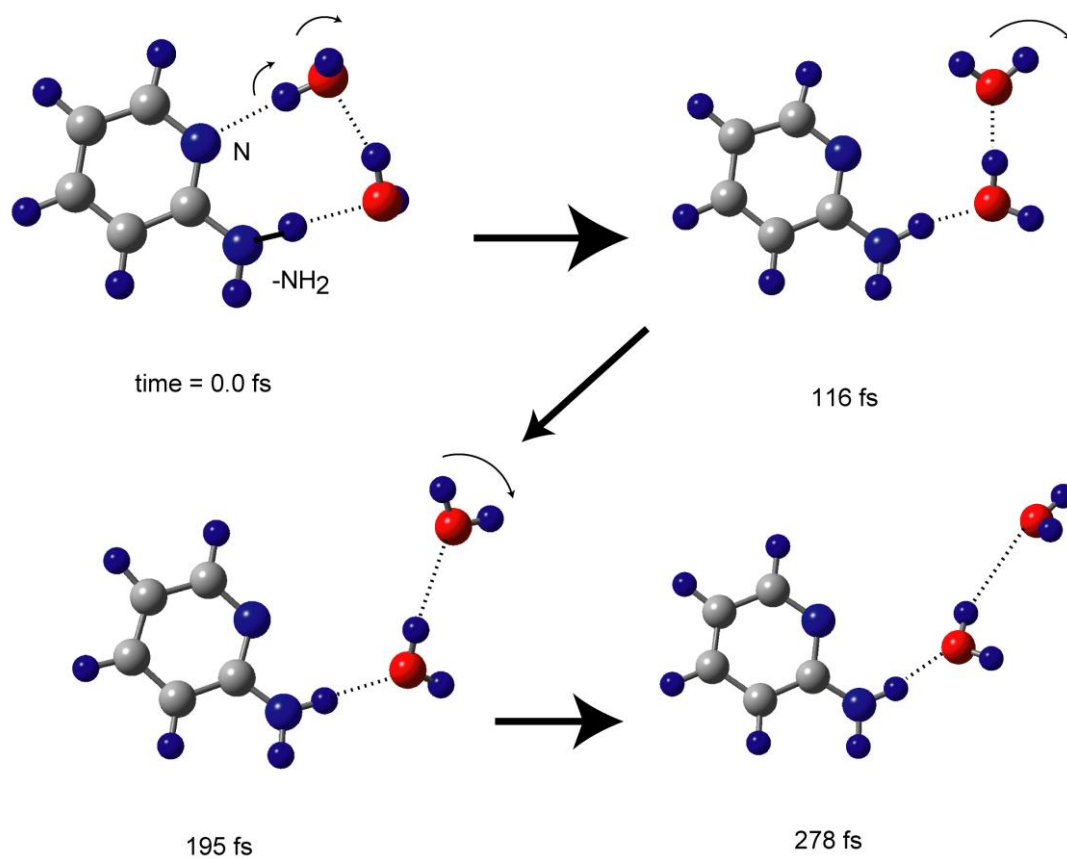

*Figure S4.* Snapshots of the ionization reaction of hydrated 2-aminopyridine dimer.

Direct ab-initio MD calculation was carried out at the HF/6-311G(d,p) level.

## 7. Energy diagram of the proton transfer reaction

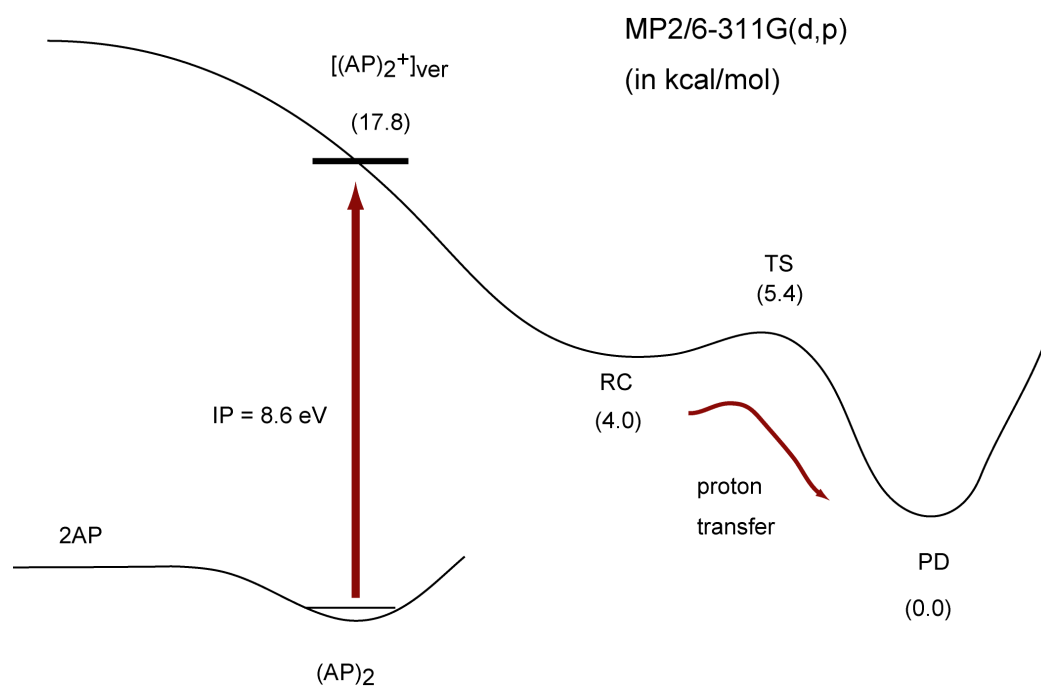

*Figure S5.* Potential energy diagram of the ionization reaction of 2-aminopyridine dimer calculated at the MP2/6-311G(d,p) level.

# 8. HOMO and LUMO of $(AP)_2$ , $[(AP)_2]^+$ <sub>ver</sub> and PD

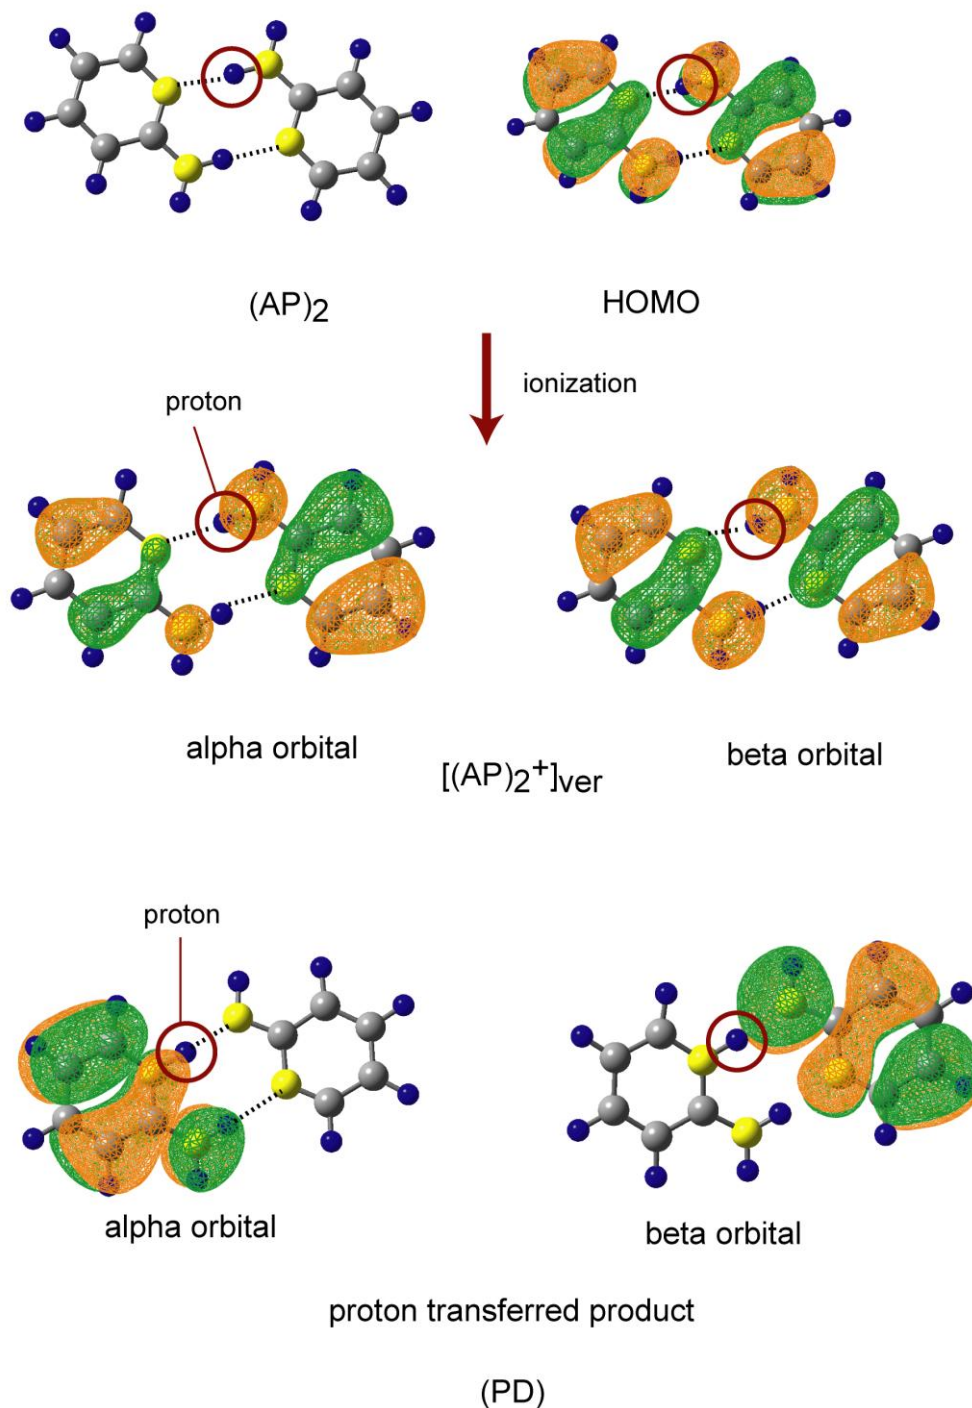

*Figure S6.* Illustrations of highest occupied molecular orbital, alpha- and beta- orbitals.



## 9. NPA atomic charges

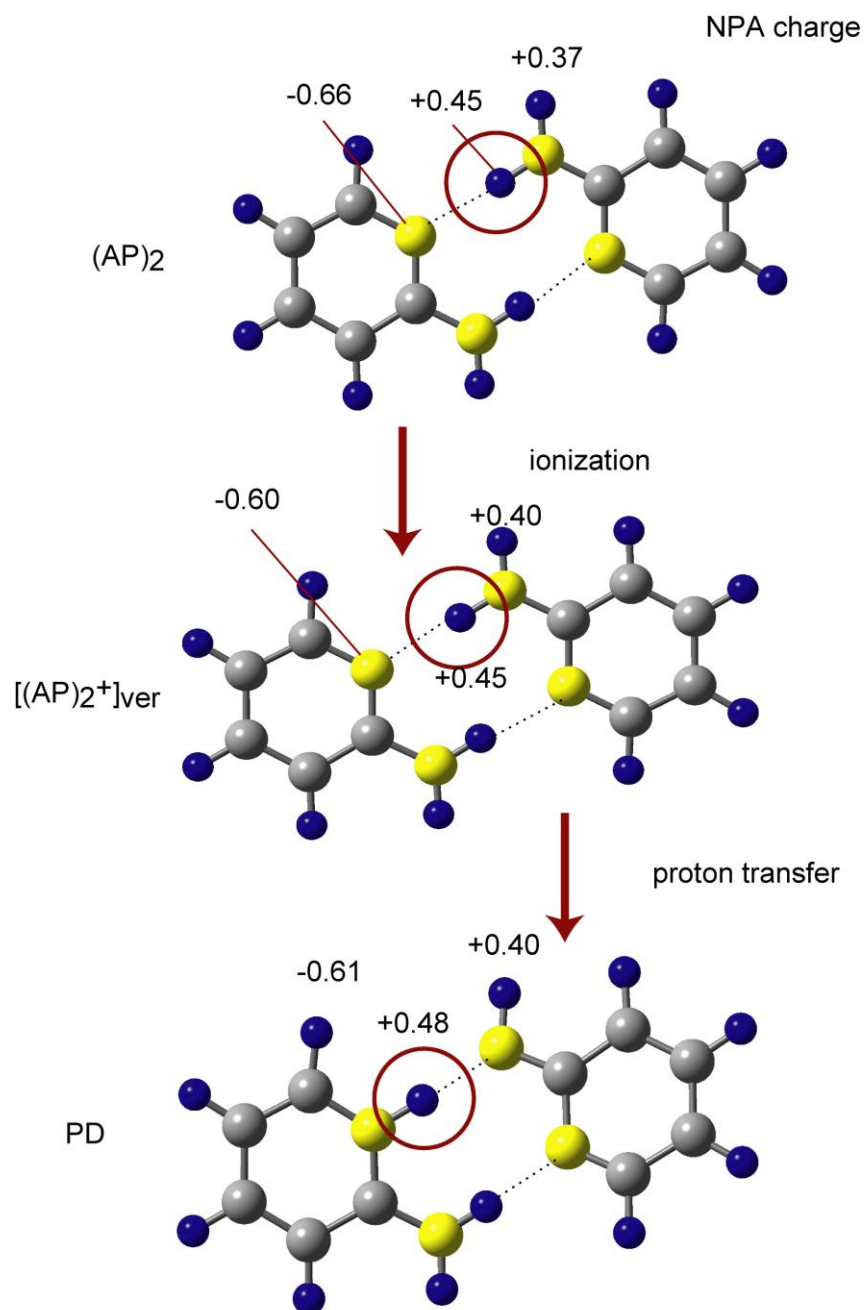

*Figure S7.* NPA atomic charges calculated at the MP2/6-311G(d,p) level.
